# Supplementary material for: From weak to strong interactions between halogen and noble gas atoms in halonium complexes
Source: Royal Society of Chemistry journal article supplement (doi:10.1039/d4cp02647k), 2024-01-01
Supplement: d4cp02647k1.pdf [file d4cp02647k1.pdf]

# SUPPORTING INFORMATION

## From Weak to Strong Interactions Between Halogen and Noble Gas Atoms in Halonium Complexes

Wiktor Zierkiewicz<sup>1\*</sup>, Steve Scheiner<sup>2</sup> and Mariusz Michalczyk<sup>\*1</sup>

<sup>1</sup>Faculty of Chemistry, Wrocław University of Science and Technology, Wybrzeże

Wyspiańskiego 27, 50-370 Wrocław, Poland, email: mariusz.michalczyk@pwr.edu.pl

<sup>2</sup> Department of Chemistry and Biochemistry, Utah State University Logan, Utah 84322-0300, United States

### Computational details

Quantum calculations were carried out with the M06-2X DFT functional, with the aid of the def2tzvpp<sup>1-4</sup> basis set within the context of the Gaussian 16 (Rev. C.01) package<sup>5</sup>. It was pointed out earlier that the DFT method is able to predict correctly the electronic structure of similar cations as those selected within current work<sup>6</sup>. Harmonic frequency analysis of normal modes verified that the optimized geometries of additional model complexes represent true minima. The counterpoise approach proposed by Boys and Bernardi removed basis set superposition error (BSSE)<sup>7</sup>. The MEP (molecular electrostatic potential) of the isolated cationic monomers was analyzed via MultiWFN software<sup>8,9</sup> in order to compute maxima on the 0.001 au isodensity surface. Graphical post-processing of the MEP was performed using the VMD software<sup>10</sup>. Using the AIMAll program<sup>11</sup>, the QTAIM analysis of the electron density topology<sup>12,13</sup> illuminated bond paths and bond critical points with associated quantum chemical parameters. The NBO method (NBO 7 version) was used to analyze<sup>14</sup> interorbital interactions within complexes and processing the Natural Resonance Theory (NRT) results. Decomposition of the interaction energy into its components was succeeded using the ALMO-EDA protocol<sup>15,16</sup>.

**Table S1.** Selected geometrical parameters of monomers. Distances in Å, angles in degs.

| No.      | R(X-C1)/R(X-C2) | $\theta$ (C1-X-C2) | No.      | R(X-N) | No.      | R(X-Xe) |
|----------|-----------------|--------------------|----------|--------|----------|---------|
| <b>1</b> | 1.835/1.931     | 45.5               | <b>4</b> | 1.693  | <b>7</b> | 2.290   |
| <b>2</b> | 1.997/2.092     | 41.5               | <b>5</b> | 1.857  | <b>8</b> | 2.463   |

|          |             |      |          |       |          |       |
|----------|-------------|------|----------|-------|----------|-------|
| <b>3</b> | 2.200/2.295 | 37.2 | <b>6</b> | 2.061 | <b>9</b> | 2.703 |
|----------|-------------|------|----------|-------|----------|-------|

**Table S2.** MEP maxima at  $\sigma$ -hole belonging to the X atoms (X= Cl, Br, I) on the 0.001 au isodensity surface, in kcal/mol.

| No.      | $V_{s,max}$ | No.      | $V_{s,max}$ | No.      | $V_{s,max}$ |
|----------|-------------|----------|-------------|----------|-------------|
| <b>1</b> | 117.3       | <b>4</b> | 114.2       | <b>7</b> | 140.4       |
| <b>2</b> | 121.6       | <b>5</b> | 122.4       | <b>8</b> | 152.0       |
| <b>3</b> | 130.0       | <b>6</b> | 135.2       | <b>9</b> | 169.2       |

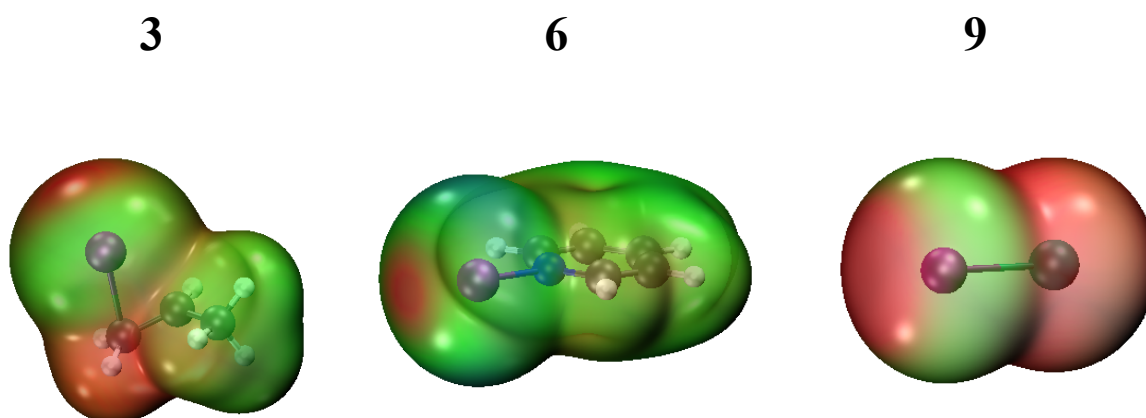

**Figure S1.** MEP for three selected monomers with the strongest MEP maxima at X atoms within each group of monomers. Color scale from 63 kcal/mol (green) to 125 kcal/mol (red). Color codes: I – purple, Xe – light blue, N – dark blue, C – grey, H – white.

**Table S3.** Selected angles describing  $V_{max}$  location in  $PrX^+$  monomers. Values in degrees.

| No.      | $\angle mp-X-V_{max}^a$ | $\angle C1-X-V_{max}$ | $\angle C2-X-V_{max}$ | deviation of the $\sigma$ -hole location from the C1-C2-X plane, degs |
|----------|-------------------------|-----------------------|-----------------------|-----------------------------------------------------------------------|
| <b>1</b> | 22.3                    | 179.0                 | 135.6                 | 0.2                                                                   |
| <b>2</b> | 9.3                     | 167.9                 | 150.5                 | 2.2                                                                   |
| <b>3</b> | 5.7                     | 166.7                 | 156.1                 | 0.5                                                                   |

<sup>a</sup> mp refers to midpoint of C1-C2 bond.

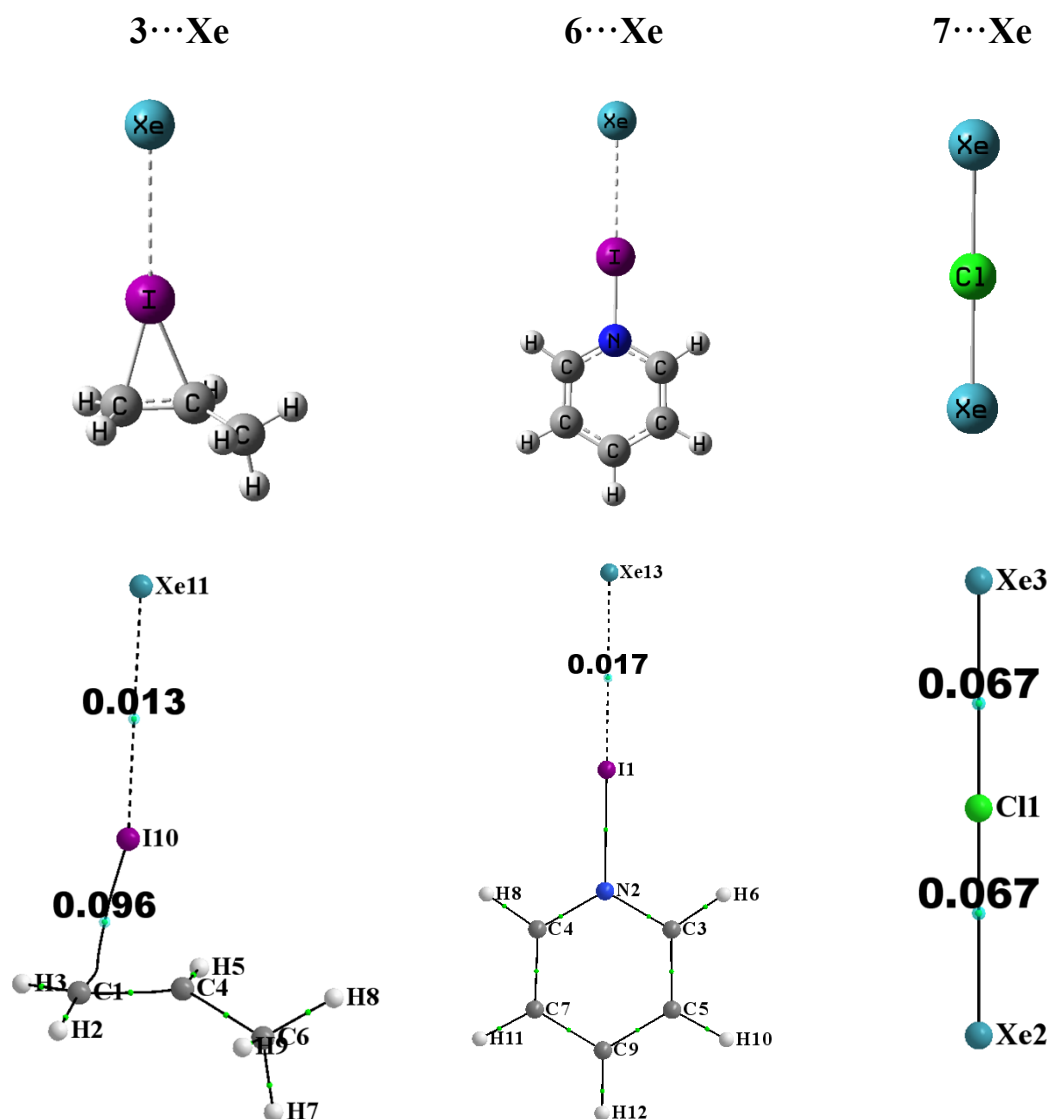

**Figure S2.** Optimized structures and QTAIM diagrams of strongest dimers in each group. Green points represent BCP. Values of  $\rho$  at BCP are given in au.

**Table S4.** Selected geometrical parameters for the halonium monomers in complexes with single noble gases atoms (Ar, Kr, Xe). Distances in Å, angles in degs.

| No. | R(X...Ng) |       |       | $\theta$ (C-X...Ng or N-X...Ng or Xe-X...Ng) |             |             | $\Delta r$ (C/N/Xe-X) (complex-monomer) |             |             |
|-----|-----------|-------|-------|----------------------------------------------|-------------|-------------|-----------------------------------------|-------------|-------------|
|     | Ar        | Kr    | Xe    | Ar                                           | Kr          | Xe          | Ar                                      | Kr          | Xe          |
| 1   | 3.348     | 3.422 | 3.548 | 175.1/139.4 <sup>a</sup>                     | 168.5/146.0 | 162.6/152.1 | 0.000/0.000 <sup>b</sup>                | 0.002/0.000 | 0.004/0.002 |
| 2   | 3.365     | 3.432 | 3.553 | 165.2/153.4                                  | 166.3/152.4 | 165.1/153.7 | 0.002/0.002                             | 0.005/0.004 | 0.009/0.007 |
| 3   | 3.395     | 3.464 | 3.572 | 165.4/157.6                                  | 165.2/157.9 | 164.9/158.4 | 0.007/0.006                             | 0.012/0.011 | 0.020/0.018 |
| 4   | 3.167     | 3.239 | 3.364 | 179.9                                        | 179.9       | 178.6       | 0.002                                   | 0.004       | 0.008       |
| 5   | 3.153     | 3.225 | 3.351 | 180.0                                        | 179.9       | 179.9       | 0.005                                   | 0.008       | 0.015       |

|          |       |       |       |       |       |       |       |       |       |
|----------|-------|-------|-------|-------|-------|-------|-------|-------|-------|
| <b>6</b> | 3.196 | 3.274 | 3.386 | 180.0 | 180.0 | 179.9 | 0.008 | 0.014 | 0.023 |
| <b>7</b> | 2.320 | 2.385 | 2.569 | 177.2 | 178.8 | 179.4 | 0.030 | 0.095 | 0.279 |
| <b>8</b> | 2.502 | 2.570 | 2.702 | 179.2 | 179.1 | 179.3 | 0.039 | 0.107 | 0.239 |
| <b>9</b> | 2.750 | 2.801 | 2.899 | 178.9 | 179.2 | 179.1 | 0.047 | 0.098 | 0.196 |

<sup>a</sup> C1-X...Ng/ C2-X...Ng. <sup>b</sup>  $\Delta r(\text{C1-X})/\Delta r(\text{C2-X})$

**Table S5.** Characteristics of complexes;  $E_{\text{int}}$  – interaction energy,  $E^{(2)}$  – second-order interaction energies between LP(Ng) and  $\sigma^*(\text{X-R})$  orbitals where X= Cl, Br, I and R= C, N or Xe (both given in kcal/mol),  $\rho$  = electron density at bond critical points (QTAIM-derived, in au),  $\nabla^2$  = Laplacian of electron density at bond critical points, H = total electron energy density at bond critical points, T1 = values of diagnostic test.

|          | $E_{\text{int}}$<br>M06-2X |        |        | $E_{\text{int}}$<br>CCSD(T) |       |        | $\rho$ at BCPs |       |       | $E^{(2)}$ , <sup>a</sup> |           |           |
|----------|----------------------------|--------|--------|-----------------------------|-------|--------|----------------|-------|-------|--------------------------|-----------|-----------|
|          | Ar                         | Kr     | Xe     | Ar                          | Kr    | Xe     | Ar             | Kr    | Xe    | Ar                       | Kr        | Xe        |
| <b>1</b> | -0.78                      | -1.09  | -1.58  | -0.62                       | -0.89 | -1.22  | 0.007          | 0.008 | 0.009 | 0.91/0.21                | 1.22/0.47 | 1.49/0.93 |
| <b>2</b> | -1.03                      | -1.50  | -2.21  | -0.76                       | -1.17 | -1.71  | 0.008          | 0.010 | 0.011 | 1.10/0.61                | 1.75/0.93 | 2.46/1.49 |
| <b>3</b> | -1.48                      | -2.22  | -3.32  | -0.85                       | -1.46 | -2.34  | 0.009          | 0.011 | 0.013 | 1.54/1.01                | 2.30/1.57 | 3.41/2.46 |
| <b>4</b> | -1.04                      | -1.47  | -2.14  | -0.58                       | -0.88 | -1.28  | 0.009          | 0.011 | 0.012 | 2.45                     | 3.53      | 4.72      |
| <b>5</b> | -1.53                      | -2.26  | -3.34  | -0.83                       | -1.43 | -2.31  | 0.012          | 0.013 | 0.015 | 4.37                     | 6.32      | 8.53      |
| <b>6</b> | -2.33                      | -3.43  | -5.01  | -1.09                       | -2.04 | -3.49  | 0.013          | 0.015 | 0.017 | 6.64                     | 9.31      | 12.98     |
| <b>7</b> | -3.36                      | -8.02  | -25.56 | -1.14                       | -3.65 | -18.01 | 0.021          | 0.039 | 0.067 | 13.81                    | 43.27     | 152.45    |
| <b>8</b> | -4.63                      | -9.98  | -23.63 | -2.28                       | -5.80 | -17.54 | 0.024          | 0.042 | 0.059 | 20.23                    | 56.95     | 129.74    |
| <b>9</b> | -5.90                      | -10.45 | -19.87 | -3.25                       | -7.01 | -15.81 | 0.023          | 0.034 | 0.046 | 23.03                    | 48.36     | 91.33     |

<sup>a</sup> refers to donation to  $\sigma^*(\text{X-C1})/\sigma^*(\text{X-C2})$  orbitals

|          | $\nabla^2$ at BCPs |       |       | H at BCPs |       |       | T1    |       |       |
|----------|--------------------|-------|-------|-----------|-------|-------|-------|-------|-------|
|          | Ar                 | Kr    | Xe    | Ar        | Kr    | Xe    | Ar    | Kr    | Xe    |
| <b>1</b> | 0.029              | 0.031 | 0.029 | 0.002     | 0.002 | 0.001 | 0.011 | 0.010 | 0.010 |
| <b>2</b> | 0.031              | 0.033 | 0.031 | 0.002     | 0.001 | 0.001 | 0.010 | 0.010 | 0.010 |
| <b>3</b> | 0.034              | 0.035 | 0.033 | 0.002     | 0.001 | 0.001 | 0.011 | 0.010 | 0.010 |
| <b>4</b> | 0.041              | 0.042 | 0.039 | 0.002     | 0.002 | 0.002 | 0.013 | 0.012 | 0.012 |

|   |       |       |       |        |        |        |       |       |       |
|---|-------|-------|-------|--------|--------|--------|-------|-------|-------|
| 5 | 0.046 | 0.046 | 0.042 | 0.002  | 0.002  | 0.001  | 0.012 | 0.011 | 0.011 |
| 6 | 0.048 | 0.046 | 0.042 | 0.002  | 0.001  | 0.000  | 0.012 | 0.011 | 0.011 |
| 7 | 0.128 | 0.102 | 0.076 | -0.023 | -0.018 | -0.014 | 0.012 | 0.010 | 0.010 |
| 8 | 0.113 | 0.086 | 0.064 | -0.016 | -0.014 | -0.011 | 0.009 | 0.008 | 0.008 |
| 9 | 0.107 | 0.079 | 0.056 | -0.005 | -0.008 | -0.008 | 0.008 | 0.007 | 0.008 |

**Table S6.** Interaction, binding, and deformation energies (kcal/mol)

|   | $E_{\text{int}}$ |        |        | $E_{\text{b}}$ |       |        | $E_{\text{def}}$ |      |      |
|---|------------------|--------|--------|----------------|-------|--------|------------------|------|------|
|   | Ar               | Kr     | Xe     | Ar             | Kr    | Xe     | Ar               | Kr   | Xe   |
| 1 | -0.78            | -1.09  | -1.58  | -0.78          | -1.09 | -1.57  | 0.00             | 0.00 | 0.01 |
| 2 | -1.03            | -1.50  | -2.21  | -1.03          | -1.49 | -2.19  | 0.00             | 0.01 | 0.02 |
| 3 | -1.48            | -2.22  | -3.32  | -1.47          | -2.19 | -3.23  | 0.01             | 0.03 | 0.09 |
| 4 | -1.04            | -1.47  | -2.14  | -1.03          | -1.47 | -2.12  | 0.01             | 0.00 | 0.02 |
| 5 | -1.53            | -2.26  | -3.34  | -1.52          | -2.24 | -3.27  | 0.01             | 0.02 | 0.07 |
| 6 | -2.33            | -3.43  | -5.01  | -2.32          | -3.39 | -4.89  | 0.01             | 0.04 | 0.12 |
| 7 | -3.36            | -8.02  | -25.56 | -3.03          | -6.43 | -15.72 | 0.33             | 1.59 | 9.84 |
| 8 | -4.63            | -9.98  | -23.63 | -4.19          | -8.38 | -17.35 | 0.44             | 1.60 | 6.28 |
| 9 | -5.90            | -10.45 | -19.87 | -5.65          | -9.54 | -16.76 | 0.25             | 0.91 | 3.11 |

**Table S7.** Quantum chemical characteristics for FX and  $X^+$  in complexes with single noble gases atoms, where X= Cl, Br, I;  $E_{\text{int}}$  – interaction energy (kcal/mol) and  $\rho$  = electron density at bond critical points (QTAIM-derived, au).

|                       | $E_{\text{int}}$ |        |         | $E_{\text{int}}$ |        |        | $\rho$ at BCPs |       |       |
|-----------------------|------------------|--------|---------|------------------|--------|--------|----------------|-------|-------|
|                       | M06-2X           |        |         | CCSD(T)          |        |        | Ar             | Kr    | Xe    |
|                       | Ar               | Kr     | Xe      | Ar               | Kr     | Xe     | Ar             | Kr    | Xe    |
| <b>FCl</b>            | -0.56            | -0.78  | -1.12   | 0.05             | 0.10   | 0.15   | 0.008          | 0.010 | 0.011 |
| <b>FBr</b>            | -0.92            | -1.32  | -1.86   | 0.07             | -0.13  | -0.36  | 0.011          | 0.012 | 0.013 |
| <b>FI</b>             | -1.39            | -1.89  | -2.57   | -0.06            | -0.36  | -0.75  | 0.010          | 0.012 | 0.012 |
| <b>Cl<sup>+</sup></b> | -66.22           | -86.21 | -110.81 | -49.70           | -69.40 | -96.02 | 0.136          | 0.128 | 0.116 |
| <b>Br<sup>+</sup></b> | -44.16           | -60.75 | -81.25  | -32.26           | -48.17 | -70.33 | 0.096          | 0.097 | 0.093 |
| <b>I<sup>+</sup></b>  | -25.67           | -37.20 | -52.23  | -17.89           | -29.05 | -45.23 | 0.057          | 0.063 | 0.066 |

**Table S8.** ALMO-EDA decomposition of interaction energies (kcal/mol). ELEC= electrostatic term, PAULI = Pauli repulsion, DISP = dispersion, POL = polarization, CT = charge transfer. Percentage contributions are listed as fraction of sum of attractive elements.

|             | $E_{\text{int}}$ | ELEC  | %  | PAULI | DISP  | %  | POL   | %  | CT     | %  |
|-------------|------------------|-------|----|-------|-------|----|-------|----|--------|----|
| <b>1⋯Ar</b> | -0.78            | -1.82 | 50 | 2.89  | -0.82 | 22 | -0.47 | 13 | -0.56  | 15 |
| <b>2⋯Ar</b> | -1.03            | -2.20 | 47 | 3.67  | -1.03 | 22 | -0.59 | 13 | -0.88  | 19 |
| <b>3⋯Ar</b> | -1.49            | -0.79 | 17 | 3.09  | -1.61 | 35 | -0.83 | 18 | -1.35  | 29 |
| <b>4⋯Ar</b> | -1.03            | -2.68 | 50 | 4.34  | -1.16 | 22 | -0.51 | 10 | -1.02  | 19 |
| <b>5⋯Ar</b> | -1.53            | -3.59 | 47 | 6.10  | -1.60 | 21 | -0.76 | 10 | -1.69  | 22 |
| <b>6⋯Ar</b> | -2.34            | -1.33 | 18 | 4.90  | -2.31 | 32 | -1.19 | 16 | -2.42  | 33 |
| <b>7⋯Ar</b> | -3.38            | -2.52 | 20 | 9.08  | -2.80 | 22 | -1.59 | 13 | -5.54  | 45 |
| <b>8⋯Ar</b> | -4.62            | -3.20 | 20 | 11.32 | -3.17 | 20 | -2.32 | 15 | -7.26  | 46 |
| <b>9⋯Ar</b> | -5.90            | -3.41 | 19 | 12.03 | -3.78 | 21 | -3.27 | 18 | -7.48  | 42 |
|             |                  |       |    |       |       |    |       |    |        |    |
| <b>1⋯Kr</b> | -1.09            | -2.32 | 46 | 3.97  | -1.03 | 20 | -0.86 | 17 | -0.85  | 17 |
| <b>2⋯Kr</b> | -1.50            | -2.80 | 43 | 5.08  | -1.33 | 20 | -1.07 | 16 | -1.38  | 21 |
| <b>3⋯Kr</b> | -2.22            | -1.36 | 19 | 4.83  | -2.08 | 30 | -1.50 | 21 | -2.11  | 30 |
| <b>4⋯Kr</b> | -1.48            | -1.07 | 21 | 3.55  | -1.49 | 30 | -0.93 | 19 | -1.53  | 30 |
| <b>5⋯Kr</b> | -2.26            | -1.69 | 22 | 5.46  | -2.02 | 26 | -1.35 | 18 | -2.67  | 35 |
| <b>6⋯Kr</b> | -3.43            | -2.21 | 20 | 7.40  | -2.89 | 27 | -2.07 | 19 | -3.67  | 34 |
| <b>7⋯Kr</b> | -8.06            | -7.70 | 23 | 25.80 | -4.79 | 14 | -3.82 | 11 | -17.55 | 52 |
| <b>8⋯Kr</b> | -9.98            | -9.21 | 23 | 29.57 | -5.03 | 13 | -5.78 | 15 | -19.53 | 49 |
| <b>9⋯Kr</b> | -10.45           | -7.72 | 22 | 24.81 | -5.34 | 15 | -6.97 | 20 | -15.23 | 43 |
|             |                  |       |    |       |       |    |       |    |        |    |
| <b>1⋯Xe</b> | -1.57            | -0.99 | 19 | 3.57  | -1.50 | 29 | -1.24 | 24 | -1.40  | 27 |

|               |        |        |    |       |       |    |        |    |        |    |
|---------------|--------|--------|----|-------|-------|----|--------|----|--------|----|
| <b>2...Xe</b> | -2.22  | -1.48  | 20 | 5.01  | -1.99 | 28 | -1.57  | 22 | -2.19  | 30 |
| <b>3...Xe</b> | -3.32  | -2.13  | 20 | 7.27  | -2.81 | 27 | -2.20  | 21 | -3.46  | 33 |
| <b>4...Xe</b> | -2.15  | -1.58  | 21 | 5.41  | -2.26 | 30 | -1.32  | 17 | -2.40  | 32 |
| <b>5...Xe</b> | -3.33  | -2.45  | 22 | 7.91  | -2.81 | 25 | -1.88  | 17 | -4.10  | 36 |
| <b>6...Xe</b> | -5.01  | -3.36  | 21 | 10.86 | -3.80 | 24 | -2.92  | 18 | -5.79  | 37 |
| <b>7...Xe</b> | -25.48 | -20.83 | 22 | 67.38 | -8.20 | 9  | -8.82  | 9  | -55.02 | 59 |
| <b>8...Xe</b> | -23.63 | -18.70 | 23 | 57.88 | -7.43 | 9  | -10.93 | 13 | -44.45 | 55 |
| <b>9...Xe</b> | -19.87 | -14.45 | 22 | 44.96 | -7.54 | 12 | -11.85 | 18 | -30.99 | 48 |

**Table S9.** NRT results. Percentage of covalent and ionic nature of bond/interaction.

|               | Covalent       | ionic |               | Covalent | ionic |               | Covalent | ionic |
|---------------|----------------|-------|---------------|----------|-------|---------------|----------|-------|
| <b>1...Ar</b> | - <sup>a</sup> | -     | <b>1...Kr</b> | -        | -     | <b>1...Xe</b> | -        | -     |
| <b>2...Ar</b> | -              | -     | <b>2...Kr</b> | -        | -     | <b>2...Xe</b> | -        | -     |
| <b>3...Ar</b> | -              | -     | <b>3...Kr</b> | -        | -     | <b>3...Xe</b> | 7        | 93    |
| <b>4...Ar</b> | -              | -     | <b>4...Kr</b> | 3        | 97    | <b>4...Xe</b> | 5        | 95    |
| <b>5...Ar</b> | 3              | 97    | <b>5...Kr</b> | 5        | 95    | <b>5...Xe</b> | 8        | 92    |
| <b>6...Ar</b> | 4              | 96    | <b>6...Kr</b> | 6        | 94    | <b>6...Xe</b> | 10       | 90    |
| <b>7...Ar</b> | 43             | 57    | <b>7...Kr</b> | 55       | 45    | <b>7...Xe</b> | 70       | 30    |
| <b>8...Ar</b> | 33             | 67    | <b>8...Kr</b> | 45       | 55    | <b>8...Xe</b> | 59       | 41    |
| <b>9...Ar</b> | 20             | 80    | <b>9...Kr</b> | 30       | 70    | <b>9...Xe</b> | 44       | 56    |

<sup>a</sup> no detection of bond/interaction in NRT analysis.

**Table S10.** Percentage of covalent and ionic nature of interaction for FX and X<sup>+</sup> in complexes with a single noble gases atom, as derived from NRT

|                 | Covalent | ionic |                 | Covalent | ionic |                 | Covalent | ionic |
|-----------------|----------|-------|-----------------|----------|-------|-----------------|----------|-------|
| <b>FCl...Ar</b> | 1        | 99    | <b>FCl...Kr</b> | 2        | 98    | <b>FCl...Xe</b> | 3        | 97    |
| <b>FBr...Ar</b> | 2        | 98    | <b>FBr...Kr</b> | 3        | 97    | <b>FBr...Xe</b> | 4        | 96    |

|                                |    |    |                                |    |    |                                 |    |    |
|--------------------------------|----|----|--------------------------------|----|----|---------------------------------|----|----|
| <b>FI<math>\cdots</math>Ar</b> | 2  | 98 | <b>FI<math>\cdots</math>Kr</b> | 3  | 97 | <b>FI<math>\cdots</math> Xe</b> | 5  | 95 |
| <b>Cl<math>\cdots</math>Ar</b> | 59 | 41 | <b>Cl<math>\cdots</math>Kr</b> | 73 | 27 | <b>Cl<math>\cdots</math> Xe</b> | 91 | 9  |
| <b>Br<math>\cdots</math>Ar</b> | 45 | 55 | <b>Br<math>\cdots</math>Kr</b> | 59 | 41 | <b>Br<math>\cdots</math> Xe</b> | 77 | 23 |
| <b>I<math>\cdots</math>Ar</b>  | 29 | 71 | <b>I<math>\cdots</math>Kr</b>  | 41 | 59 | <b>I<math>\cdots</math> Xe</b>  | 57 | 43 |

**Table S11.** Coordinates of monomers and complexes

### MONOMERS

|          |            |             |             |             |
|----------|------------|-------------|-------------|-------------|
| <b>1</b> | C          | -5.59744700 | 4.79229600  | 0.54079600  |
|          | H          | -5.06064300 | 3.85623600  | 0.63340800  |
|          | H          | -6.62294300 | 4.74546000  | 0.19851500  |
|          | C          | -4.83183700 | 6.02033300  | 0.36626600  |
|          | H          | -5.38330700 | 6.88451700  | 0.01206100  |
|          | C          | -3.35395700 | 6.04552000  | 0.28978500  |
|          | H          | -3.11151800 | 6.01741500  | -0.77875300 |
|          | H          | -2.95128500 | 6.97196900  | 0.69231200  |
|          | H          | -2.90039500 | 5.18406900  | 0.77478900  |
|          | Cl         | -5.52924600 | 5.69405700  | 2.13723900  |
| <b>2</b> | C          | -5.58871300 | 4.79027000  | 0.51509700  |
|          | H          | -5.04948500 | 3.85495500  | 0.59978100  |
|          | H          | -6.61125400 | 4.74522400  | 0.16407500  |
|          | C          | -4.83066600 | 6.01739300  | 0.36140100  |
|          | H          | -5.38098600 | 6.88425200  | 0.01152200  |
|          | C          | -3.35213300 | 6.04508200  | 0.27841800  |
|          | H          | -3.11532200 | 6.01533300  | -0.79195300 |
|          | H          | -2.94568500 | 6.97198300  | 0.67541200  |
|          | H          | -2.89337100 | 5.18518600  | 0.76113400  |
|          | Br         | -5.57496400 | 5.70219400  | 2.29153000  |
| <b>3</b> | C          | -5.57814100 | 4.79112000  | 0.47945400  |
|          | H          | -5.03948600 | 3.85497700  | 0.56122600  |
|          | H          | -6.59953800 | 4.74795700  | 0.12443500  |
|          | C          | -4.82947100 | 6.01031600  | 0.34758300  |
|          | H          | -5.37730600 | 6.88174500  | 0.00354900  |
|          | C          | -3.34771400 | 6.04310700  | 0.26578100  |
|          | H          | -3.10748200 | 6.01128600  | -0.80369700 |
|          | H          | -2.94152400 | 6.97035200  | 0.66172600  |
|          | H          | -2.88636300 | 5.18562600  | 0.75064900  |
|          | I          | -5.63555300 | 5.71538600  | 2.47571100  |
| <b>4</b> | Cl         | -1.17277200 | 4.89191100  | 0.80318200  |
|          | N          | 0.52025700  | 4.88573500  | 0.80776700  |
|          | C          | 1.16431200  | 4.88864500  | -0.37392400 |
|          | C          | 1.15792100  | 4.87818300  | 1.99289800  |
|          | C          | 2.54033300  | 4.88374700  | -0.38766300 |
|          | H          | 0.54675200  | 4.89478500  | -1.25933800 |
|          | C          | 2.53385000  | 4.87310700  | 2.01402100  |
|          | H          | 0.53558100  | 4.87655800  | 2.87498500  |
|          | C          | 3.23414200  | 4.87590500  | 0.81505200  |
|          | H          | 3.05170400  | 4.88614100  | -1.33886300 |
| <b>5</b> | H          | 3.04006000  | 4.86702000  | 2.96796400  |
|          | H          | 4.31548000  | 4.87199000  | 0.81794900  |
|          | Br         | -1.32885900 | 4.89217600  | 0.80285400  |
|          | N          | 0.52811100  | 4.88583200  | 0.80777200  |
|          | C          | 1.17733700  | 4.88869500  | -0.37100300 |
|          | C          | 1.17096600  | 4.87824100  | 1.99000800  |
| C        | 2.55372800 | 4.88370700  | -0.38645300 |             |
| H        | 0.56773000 | 4.89484600  | -1.26198200 |             |



|          |    |             |            |             |
|----------|----|-------------|------------|-------------|
|          | C  | 2.54724700  | 4.87311700 | 2.01288100  |
|          | H  | 0.55652600  | 4.87648500 | 2.87767900  |
|          | C  | 3.24892000  | 4.87581900 | 0.81509400  |
|          | H  | 3.06367500  | 4.88602400 | -1.33848200 |
|          | H  | 3.05199800  | 4.86700000 | 2.96766000  |
|          | H  | 4.33024000  | 4.87178500 | 0.81800100  |
| <b>6</b> | I  | -1.52762500 | 4.89360100 | 0.80210500  |
|          | N  | 0.53363300  | 4.88563900 | 0.80782800  |
|          | C  | 1.19439400  | 4.88842100 | -0.36517500 |
|          | C  | 1.18805900  | 4.87801000 | 1.98435600  |
|          | C  | 2.57111400  | 4.88358500 | -0.38478900 |
|          | H  | 0.59456500  | 4.89448700 | -1.26293200 |
|          | C  | 2.56466000  | 4.87302600 | 2.01131800  |
|          | H  | 0.58340700  | 4.87606700 | 2.87890600  |
|          | C  | 3.26824000  | 4.87588500 | 0.81514200  |
|          | H  | 3.07962200  | 4.88593900 | -1.33760100 |
|          | H  | 3.06803100  | 4.86696400 | 2.96684000  |
|          | H  | 4.34952100  | 4.87210200 | 0.81803100  |
| <b>7</b> | Cl | -1.80472800 | 4.89405300 | 0.80124800  |
|          | Xe | -4.09498400 | 4.90209400 | 0.79421800  |
| <b>8</b> | Br | -1.71840200 | 4.89375000 | 0.80151300  |
|          | Xe | -4.18131000 | 4.90239700 | 0.79395300  |
| <b>9</b> | i  | -1.33743200 | 4.89241300 | 0.80268200  |
|          | xe | -4.56228000 | 4.90373400 | 0.79278400  |

## DIMERS

|          |          | Ar          |             |             |
|----------|----------|-------------|-------------|-------------|
| <b>1</b> | C        | -5.56338200 | 4.71784200  | 0.31052200  |
|          | H        | -5.00355100 | 3.79414500  | 0.23310600  |
|          | H        | -6.59005300 | 4.70728300  | -0.03089500 |
|          | C        | -4.82967300 | 5.97593400  | 0.35305400  |
|          | H        | -5.40385800 | 6.87506700  | 0.15801100  |
|          | C        | -3.35305000 | 6.05114800  | 0.27880100  |
|          | H        | -3.11661900 | 6.21899100  | -0.77810900 |
|          | H        | -2.96995700 | 6.90083300  | 0.83882300  |
|          | H        | -2.87580000 | 5.12896000  | 0.60231500  |
|          | Cl       | -5.50445900 | 5.32567700  | 2.04104900  |
|          | Ar       | -5.52022600 | 6.19040400  | 5.27527100  |
|          | <b>2</b> | C           | -5.53674200 | 4.74977100  |
| H        |          | -4.98613600 | 3.81825300  | 0.31250300  |
| H        |          | -6.57320200 | 4.72927000  | 0.04448800  |
| C        |          | -4.79799800 | 5.99527400  | 0.30595600  |
| H        |          | -5.37028300 | 6.88803300  | 0.07761300  |
| C        |          | -3.32427600 | 6.05243300  | 0.16632600  |
| H        |          | -3.13140900 | 6.14256300  | -0.90933800 |
| H        |          | -2.91011400 | 6.93559600  | 0.64628000  |
| H        |          | -2.83825700 | 5.15132000  | 0.53333600  |
| Br       |          | -5.45522900 | 5.46055400  | 2.22079100  |
| Ar       |          | -5.80698100 | 5.96321700  | 5.52980600  |
| <b>3</b> |          | C           | -5.52126600 | 4.76314400  |
|          | H        | -4.97631600 | 3.82745400  | 0.29046100  |
|          | H        | -6.55731700 | 4.74294200  | 0.00059100  |
|          | C        | -4.78637700 | 5.99268200  | 0.25906600  |
|          | H        | -5.35129800 | 6.88734100  | 0.01814400  |
|          | C        | -3.30898900 | 6.04680800  | 0.12438500  |
|          | H        | -3.10904700 | 6.12064900  | -0.95114300 |
|          | H        | -2.89239300 | 6.93460600  | 0.59308800  |
|          | H        | -2.82480400 | 5.15068600  | 0.50624900  |
|          | I        | -5.50278800 | 5.50600300  | 2.39089300  |

|           |          |             |             |             |            |
|-----------|----------|-------------|-------------|-------------|------------|
|           | Ar       | -5.90003200 | 5.91396900  | 5.73801100  |            |
| <b>4</b>  | Cl       | -1.19225600 | 4.89317500  | 0.80272700  |            |
|           | N        | 0.50302900  | 4.88647100  | 0.80751100  |            |
|           | C        | 1.14811400  | 4.88911600  | -0.37364100 |            |
|           | C        | 1.14146500  | 4.87866900  | 1.99224600  |            |
|           | C        | 2.52379900  | 4.88365800  | -0.38749800 |            |
|           | H        | 0.53024200  | 4.89548800  | -1.25898200 |            |
|           | C        | 2.51705400  | 4.87303400  | 2.01378500  |            |
|           | H        | 0.51862500  | 4.87728900  | 2.87412700  |            |
|           | C        | 3.21798200  | 4.87552600  | 0.81509500  |            |
|           | H        | 3.03475200  | 4.88583300  | -1.33892500 |            |
|           | H        | 3.02263500  | 4.86673800  | 2.96806300  |            |
|           | H        | 4.29928200  | 4.87115100  | 0.81810700  |            |
|           | Ar       | -4.35938400 | 4.90131200  | 0.79419900  |            |
|           | <b>5</b> | Br          | -1.33953300 | 4.89249800  | 0.80221800 |
| N         |          | 0.52198600  | 4.88595900  | 0.80749800  |            |
| C         |          | 1.17217000  | 4.88877000  | -0.37032100 |            |
| C         |          | 1.16546200  | 4.87832000  | 1.98897600  |            |
| C         |          | 2.54859000  | 4.88369400  | -0.38630200 |            |
| H         |          | 0.56259300  | 4.89497400  | -1.26136300 |            |
| C         |          | 2.54176700  | 4.87310000  | 2.01275700  |            |
| H         |          | 0.55081200  | 4.87661900  | 2.87654800  |            |
| C         |          | 3.24373700  | 4.87575900  | 0.81520600  |            |
| H         |          | 3.05865600  | 4.88599100  | -1.33823700 |            |
| H         |          | 3.04638100  | 4.86695700  | 2.96757800  |            |
| H         |          | 4.32502800  | 4.87165800  | 0.81826100  |            |
| Ar        |          | -4.49231000 | 4.90316100  | 0.79399500  |            |
| <b>6</b>  |          | I           | -1.52204700 | 4.89289200  | 0.80169100 |
|           | N        | 0.54706500  | 4.88564700  | 0.80763800  |            |
|           | C        | 1.20786700  | 4.88740200  | -0.36417800 |            |
|           | C        | 1.20126200  | 4.87913400  | 1.98314200  |            |
|           | C        | 2.58502700  | 4.88252000  | -0.38476700 |            |
|           | H        | 0.60844400  | 4.89271000  | -1.26226500 |            |
|           | C        | 2.57828800  | 4.87411000  | 2.01142400  |            |
|           | H        | 0.59679400  | 4.87809200  | 2.87786700  |            |
|           | C        | 3.28163800  | 4.87580000  | 0.81528800  |            |
|           | H        | 3.09428400  | 4.88403100  | -1.33711000 |            |
|           | H        | 3.08217400  | 4.86891100  | 2.96660800  |            |
|           | H        | 4.36292500  | 4.87189800  | 0.81830600  |            |
|           | Ar       | -4.71838300 | 4.90431100  | 0.79316900  |            |
|           | <b>7</b> | Cl          | -1.49931100 | 4.89892000  | 0.84295600 |
| Xe        |          | -3.81831700 | 4.89766600  | 0.77133800  |            |
| Ar        |          | 1.30545100  | 4.88050100  | 0.79270800  |            |
| <b>8</b>  | Br       | -1.44487200 | 4.89098300  | 0.78994700  |            |
|           | Xe       | -3.94677100 | 4.90252700  | 0.80122300  |            |
|           | Ar       | 1.37946600  | 4.88357600  | 0.81583200  |            |
| <b>9</b>  | I        | -1.39288400 | 4.89516300  | 0.82005600  |            |
|           | Xe       | -4.14245800 | 4.90088000  | 0.78459900  |            |
|           | Ar       | 1.52316500  | 4.88104300  | 0.80234700  |            |
| <b>Kr</b> |          |             |             |             |            |
| <b>1</b>  | C        | -5.55735300 | 4.73229800  | 0.34002100  |            |
|           | H        | -5.00143500 | 3.80416300  | 0.29458600  |            |
|           | H        | -6.58728900 | 4.71181300  | 0.00916700  |            |
|           | C        | -4.81954700 | 5.98772800  | 0.32676900  |            |
|           | H        | -5.39225600 | 6.88071700  | 0.10157900  |            |
|           | C        | -3.34325300 | 6.05435500  | 0.23685000  |            |
|           | H        | -3.11496800 | 6.17617500  | -0.82809200 |            |
|           | H        | -2.95245000 | 6.92529900  | 0.75740800  |            |
|           | H        | -2.86658900 | 5.14480500  | 0.59517500  |            |
|           | Cl       | -5.48077300 | 5.40741700  | 2.04626800  |            |
|           | Kr       | -5.61471400 | 6.06151500  | 5.40221500  |            |
|           | <b>2</b> | C           | -5.53934000 | 4.74950500  | 0.33498400 |
|           |          | H           | -4.98948500 | 3.81753400  | 0.29479500 |
| H         |          | -6.57340300 | 4.73120400  | 0.01739600  |            |

|          |    |             |            |             |
|----------|----|-------------|------------|-------------|
|          | C  | -4.79979000 | 5.99361900 | 0.29831600  |
|          | H  | -5.36901400 | 6.88811900 | 0.06929300  |
|          | C  | -3.32462300 | 6.05056800 | 0.17294400  |
|          | H  | -3.12082700 | 6.14610700 | -0.90013900 |
|          | H  | -2.91455000 | 6.93081500 | 0.66171400  |
|          | H  | -2.84287500 | 5.14729300 | 0.54026300  |
|          | Br | -5.47319400 | 5.45256300 | 2.20778700  |
|          | Kr | -5.78352500 | 5.97895700 | 5.58459500  |
| <b>3</b> | C  | -5.52089100 | 4.76499700 | 0.30383900  |
|          | H  | -4.97698800 | 3.82871800 | 0.28289500  |
|          | H  | -6.55792100 | 4.74519600 | -0.00433900 |
|          | C  | -4.78647900 | 5.99260200 | 0.25027200  |
|          | H  | -5.35083900 | 6.88812900 | 0.01137900  |
|          | C  | -3.30882400 | 6.04684100 | 0.11691900  |
|          | H  | -3.10707600 | 6.12255900 | -0.95804300 |
|          | H  | -2.89251000 | 6.93347700 | 0.58805700  |
|          | H  | -2.82539600 | 5.14991700 | 0.49788500  |
|          | I  | -5.50089800 | 5.50703000 | 2.38788300  |
|          | Kr | -5.90280300 | 5.90681700 | 5.80520200  |
| <b>4</b> | Cl | -1.18865000 | 4.89368400 | 0.80216200  |
|          | N  | 0.50876800  | 4.88679600 | 0.80718000  |
|          | C  | 1.15408600  | 4.88906900 | -0.37356500 |
|          | C  | 1.14706200  | 4.87911900 | 1.99171100  |
|          | C  | 2.52985900  | 4.88332700 | -0.38746700 |
|          | H  | 0.53636000  | 4.89536700 | -1.25901100 |
|          | C  | 2.52272600  | 4.87320700 | 2.01373700  |
|          | H  | 0.52407500  | 4.87803300 | 2.87349300  |
|          | C  | 3.22385800  | 4.87529700 | 0.81519700  |
|          | H  | 3.04100900  | 4.88518800 | -1.33877400 |
|          | H  | 3.02819300  | 4.86699900 | 2.96806000  |
|          | H  | 4.30514800  | 4.87067400 | 0.81838700  |
|          | Kr | -4.42715400 | 4.90069900 | 0.79570400  |
| <b>5</b> | Br | -1.33745100 | 4.89189000 | 0.80318400  |
|          | N  | 0.52805800  | 4.88551300 | 0.80803700  |
|          | C  | 1.17793900  | 4.88847000 | -0.36949200 |
|          | C  | 1.17188100  | 4.87803100 | 1.98887100  |
|          | C  | 2.55450000  | 4.88374100 | -0.38628100 |
|          | H  | 0.56818800  | 4.89453300 | -1.26044000 |
|          | C  | 2.54833900  | 4.87315400 | 2.01270300  |
|          | H  | 0.55755100  | 4.87619000 | 2.87668800  |
|          | C  | 3.24997500  | 4.87601000 | 0.81499900  |
|          | H  | 3.06438200  | 4.88616600 | -1.33829300 |
|          | H  | 3.05330700  | 4.86714700 | 2.96731800  |
|          | H  | 4.33126000  | 4.87221300 | 0.81776100  |
|          | Kr | -4.56259000 | 4.90440100 | 0.79175800  |
| <b>6</b> | I  | -1.52115900 | 4.89293600 | 0.80213400  |
|          | N  | 0.55362300  | 4.88554700 | 0.80788300  |
|          | C  | 1.21455300  | 4.88711800 | -0.36339800 |
|          | C  | 1.20822100  | 4.87925200 | 1.98270100  |
|          | C  | 2.59183100  | 4.88228200 | -0.38466900 |
|          | H  | 0.61502500  | 4.89227100 | -1.26147300 |
|          | C  | 2.58537000  | 4.87427600 | 2.01135400  |
|          | H  | 0.60385700  | 4.87835500 | 2.87755500  |
|          | C  | 3.28864900  | 4.87579000 | 0.81522400  |
|          | H  | 3.10100300  | 4.88366000 | -1.33704200 |
|          | H  | 3.08939200  | 4.86926900 | 2.96645400  |
|          | H  | 4.36991900  | 4.87195100 | 0.81811900  |
|          | Kr | -4.79494400 | 4.90475400 | 0.79197300  |
| <b>7</b> | Cl | -1.43671800 | 4.89524500 | 0.81942500  |
|          | Xe | -3.82236000 | 4.89968600 | 0.78509900  |
|          | Kr | 1.24690200  | 4.88215600 | 0.80247900  |
| <b>8</b> | Br | -1.38878600 | 4.89449400 | 0.81557600  |
|          | Xe | -3.95906900 | 4.90061100 | 0.78773500  |
|          | Kr | 1.33567800  | 4.88198100 | 0.80369200  |

|          |          |             |             |             |
|----------|----------|-------------|-------------|-------------|
| <b>9</b> | I        | -1.36590100 | 4.89430200  | 0.81487500  |
|          | Xe       | -4.16693100 | 4.90140500  | 0.78753900  |
|          | Kr       | 1.52065600  | 4.88137900  | 0.80458800  |
|          | Xe       |             |             |             |
| <b>1</b> | C        | -5.55135900 | 4.75044400  | 0.36505800  |
|          | H        | -5.00434300 | 3.81637100  | 0.33893000  |
|          | H        | -6.58686300 | 4.72955300  | 0.05227100  |
|          | C        | -4.80446300 | 5.99784600  | 0.30400800  |
|          | H        | -5.37389500 | 6.88846900  | 0.06199900  |
|          | C        | -3.32914300 | 6.05067100  | 0.18959700  |
|          | H        | -3.11593800 | 6.13941000  | -0.88164700 |
|          | H        | -2.92404800 | 6.93329100  | 0.67858200  |
|          | H        | -2.85370800 | 5.14838500  | 0.56738300  |
|          | Cl       | -5.44205400 | 5.47391500  | 2.05199700  |
|          | Xe       | -5.74481100 | 5.95792900  | 5.55377100  |
|          | <b>2</b> | C           | -5.53687900 | 4.75298300  |
| H        |          | -4.98850400 | 3.81999500  | 0.29306300  |
| H        |          | -6.57240800 | 4.73378100  | 0.01597200  |
| C        |          | -4.79720400 | 5.99491800  | 0.28330100  |
| H        |          | -5.36580700 | 6.88915700  | 0.05192400  |
| C        |          | -3.32201200 | 6.05000500  | 0.15542200  |
| H        |          | -3.11884600 | 6.14060000  | -0.91813200 |
| H        |          | -2.91037600 | 6.93167700  | 0.64027000  |
| H        |          | -2.84093800 | 5.14781000  | 0.52629700  |
| Br       |          | -5.46559400 | 5.46620400  | 2.20193700  |
| Xe       |          | -5.81205800 | 5.95915400  | 5.70339700  |
| <b>3</b> |          | C           | -5.51810400 | 4.76600800  |
|          | H        | -4.97459100 | 3.82957200  | 0.27089300  |
|          | H        | -6.55753000 | 4.74563200  | -0.00723500 |
|          | C        | -4.78628900 | 5.99174400  | 0.23711900  |
|          | H        | -5.35181300 | 6.88802500  | 0.00399800  |
|          | C        | -3.30878500 | 6.04861500  | 0.10230100  |
|          | H        | -3.10711900 | 6.12963300  | -0.97218400 |
|          | H        | -2.89308200 | 6.93334500  | 0.57756300  |
|          | H        | -2.82410400 | 5.15053600  | 0.47893900  |
|          | I        | -5.49211800 | 5.50503500  | 2.38630600  |
|          | Xe       | -5.91709200 | 5.89813800  | 5.91179300  |
|          | <b>4</b> | Cl          | -1.18213700 | 4.87712500  |
| N        |          | 0.51892100  | 4.87668200  | 0.81639400  |
| C        |          | 1.15871100  | 4.88147400  | -0.36692200 |
| C        |          | 1.16247400  | 4.87381300  | 1.99761800  |
| C        |          | 2.53448700  | 4.88400800  | -0.38756000 |
| H        |          | 0.53681600  | 4.88338900  | -1.24948600 |
| C        |          | 2.53839000  | 4.87621300  | 2.01361300  |
| H        |          | 0.54358000  | 4.87004200  | 2.88228400  |
| C        |          | 3.23399000  | 4.88163900  | 0.81189500  |
| H        |          | 3.04122400  | 4.88812200  | -1.34120100 |
| H        |          | 3.04840500  | 4.87411000  | 2.96550700  |
| Xe       |          | -4.54480700 | 4.92675100  | 0.75679700  |
| <b>5</b> | Br       | -1.33314800 | 4.89181100  | 0.80310000  |
|          | N        | 0.53875700  | 4.88543700  | 0.80802600  |
|          | C        | 1.18850700  | 4.88838600  | -0.36889800 |
|          | C        | 1.18240200  | 4.87798600  | 1.98827700  |
|          | C        | 2.56525800  | 4.88369600  | -0.38621300 |
|          | H        | 0.57879100  | 4.89441600  | -1.25990600 |
|          | C        | 2.55904800  | 4.87314600  | 2.01268400  |
|          | H        | 0.56807400  | 4.87613400  | 2.87613200  |
|          | C        | 3.26067300  | 4.87600200  | 0.81503700  |
|          | H        | 3.07525900  | 4.88612200  | -1.33814000 |
|          | H        | 3.06409600  | 4.86716800  | 2.96723500  |
|          | Xe       | -4.68432200 | 4.90490900  | 0.79166400  |

|          |             |             |            |             |
|----------|-------------|-------------|------------|-------------|
| <b>6</b> | I           | -1.52067400 | 4.89264500 | 0.80234500  |
|          | N           | 0.56350900  | 4.88535600 | 0.80799400  |
|          | C           | 1.22442300  | 4.88783300 | -0.36248100 |
|          | C           | 1.21824600  | 4.87826900 | 1.98192500  |
|          | C           | 2.60194200  | 4.88313500 | -0.38461500 |
|          | H           | 0.62477000  | 4.89359700 | -1.26055600 |
|          | C           | 2.59563400  | 4.87339600 | 2.01125800  |
|          | H           | 0.61387600  | 4.87667500 | 2.87685900  |
|          | C           | 3.29884200  | 4.87583700 | 0.81515500  |
|          | H           | 3.11118700  | 4.88525600 | -1.33692400 |
|          | H           | 3.09985500  | 4.86774800 | 2.96622500  |
|          | H           | 4.38010000  | 4.87210100 | 0.81797700  |
| Xe       | -4.90637000 | 4.90561100  | 0.79165300 |             |
| <b>7</b> | Cl          | -1.33737700 | 4.89102500 | 0.79315700  |
|          | Xe          | -3.90624800 | 4.90210900 | 0.79945400  |
|          | Xe          | 1.23144900  | 4.88395200 | 0.81439100  |
| <b>8</b> | Br          | -1.33742700 | 4.89392000 | 0.81303000  |
|          | Xe          | -4.03973000 | 4.90113400 | 0.78912900  |
|          | Xe          | 1.36498000  | 4.88203300 | 0.80484400  |
| <b>9</b> | I           | -1.33735400 | 4.89019400 | 0.78745300  |
|          | Xe          | -4.23675700 | 4.90369300 | 0.80134500  |
|          | Xe          | 1.56193400  | 4.88319900 | 0.81820400  |

#### References:

1. F. Weigend, *Physical Chemistry Chemical Physics*, 2006, **8**, 1057-1065.
2. F. Weigend and R. Ahlrichs, *Physical Chemistry Chemical Physics*, 2005, **7**, 3297-3305.
3. Y. Zhao and D. G. Truhlar, *Accounts of Chemical Research*, 2008, **41**, 157-167.
4. Y. Zhao and D. G. Truhlar, *Theor Chem Acc*, 2008, **120**, 215-241.
5. M. J. Frisch, G. W. Trucks, H. B. Schlegel, G. E. Scuseria, M. A. Robb, J. R. Cheeseman, G. Scalmani, V. Barone, G. A. Petersson, H. Nakatsuji, X. Li, M. Caricato, A. V. Marenich, J. Bloino, B. G. Janesko, R. Gomperts, B. Mennucci, H. P. Hratchian, J. V. Ortiz, A. F. Izmaylov, J. L. Sonnenberg, Williams, F. Ding, F. Lipparini, F. Egidi, J. Goings, B. Peng, A. Petrone, T. Henderson, D. Ranasinghe, V. G. Zakrzewski, J. Gao, N. Rega, G. Zheng, W. Liang, M. Hada, M. Ehara, K. Toyota, R. Fukuda, J. Hasegawa, M. Ishida, T. Nakajima, Y. Honda, O. Kitao, H. Nakai, T. Vreven, K. Throssell, J. A. Montgomery Jr., J. E. Peralta, F. Ogliaro, M. J. Bearpark, J. J. Heyd, E. N. Brothers, K. N. Kudin, V. N. Staroverov, T. A. Keith, R. Kobayashi, J. Normand, K. Raghavachari, A. P. Rendell, J. C. Burant, S. S. Iyengar, J. Tomasi, M. Cossi, J. M. Millam, M. Klene, C. Adamo, R. Cammi, J. W. Ochterski, R. L. Martin, K. Morokuma, O. Farkas, J. B. Foresman and D. J. Fox, *Journal*, 2016.
6. J. Heo, D. Kim, A. Segalina, H. Ki, D. S. Ahn, S. Lee, J. Kim, Y. Cha, K. W. Lee, J. Yang, J. P. F. Nunes, X. Wang and H. Ihee, *Nature*, 2024, **625**, 710-714.
7. S. F. Boys and F. Bernardi, *Mol Phys*, 1970, **19**, 553-566.
8. T. Lu and F. Chen, *Journal of Molecular Graphics and Modelling*, 2012, **38**, 314-323.
9. T. Lu and F. Chen, *J Comput Chem*, 2012, **33**, 580-592.
10. W. Humphrey, A. Dalke and K. Schulten, *J Mol Graph Model*, 1996, **14**, 33-38.
11. A. T. Keith, *Journal*, 2014.
12. R. Bader, *Atoms In Molecules. A Quantum Theory*, Clarendon Press, Oxford, 1990.
13. R. F. W. Bader, *Journal of Physical Chemistry A*, 1998, **102**, 7314-7323.
14. F. Weinhold, C. R. Landis and E. D. Glendening, *Int Rev Phys Chem*, 2016, **35**, 399-440.
15. P. R. Horn, Y. Mao and M. Head-Gordon, *Physical Chemistry Chemical Physics*, 2016, **18**, 23067-23079.

16. P. R. Horn, Y. Mao and M. Head-Gordon, *The Journal of Chemical Physics*, 2016, **144**, 114107.
